1 **Detection of Hemagglutinin H5 influenza A virus RNA and model of potential**  
2 **inputs in an urban California sewershed**

3  
4 Abigail P. Paulos<sup>1</sup>, Stephen P. Hilton<sup>1</sup>, Bridgette Shelden<sup>2</sup>, Dorothea Duong<sup>2</sup>,  
5 Alexandria B. Boehm<sup>3</sup>, Marlene K. Wolfe<sup>1\*</sup>

6  
7 <sup>1</sup> Gangarosa Department of Environmental Health, Rollins School of Public Health,  
8 Emory University, 1518 Clifton Road, Atlanta, Georgia 30322, United States

9 <sup>2</sup> Verily Life Sciences LLC, South San Francisco, California 94080, United States

10 <sup>3</sup> Department of Civil and Environmental Engineering, Stanford University, 473 Via  
11 Ortega, Stanford, California 94305, United States

12  
13 \* Author to whom correspondence should be addressed: [marlene.wolfe@emory.edu](mailto:marlene.wolfe@emory.edu)

14  
15 **TOC figure**

16

**Influenza A H5 in wastewater**

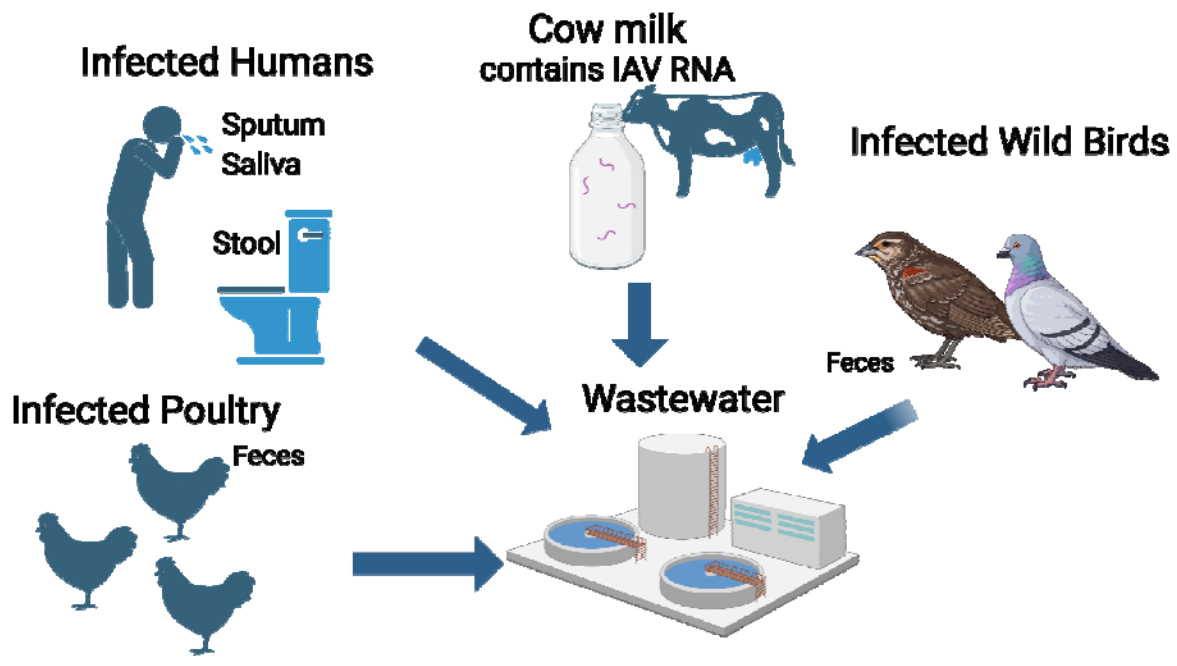

17  
18  
19  
20  
21  
22

## 23 **Abstract**

24 In 2024, the highly pathogenic avian influenza A H5N1 caused outbreaks in wild birds,  
25 poultry, cows, and other mammals in the United States with 61 human cases also  
26 reported by the CDC. Detection of influenza A H5 RNA in wastewater has been  
27 previously reported in sewersheds in Texas and North Carolina with nearby impacted  
28 dairy herds following the emergence of H5N1 in dairy cows. Here, we conduct  
29 retrospective testing of total influenza A and H5 hemagglutinin genes in wastewater as  
30 well presenting and applying new assays for detection of H1 and H3 genes across a  
31 respiratory virus season in an urban California sewershed from September 2023 – May  
32 2024. Total influenza A, H1, and H3 were regularly detected, while H5 was first detected  
33 in March. We developed a model that uses Monte Carlo simulations and previously  
34 published parameters to estimate numbers of infected people, poultry, wild birds, or  
35 liters of H5-contaminated milk required to result in measured H5 concentrations in  
36 wastewater. Our findings demonstrate that in this California sewershed, contaminated  
37 milk or infected poultry were the most likely sources of H5 to wastewater. We created a  
38 publicly available tool to apply the H5 input model in other sewersheds estimate  
39 required inputs.

## 41 **Synopsis**

42 We developed a model to understand potential sources of influenza A H5 RNA in  
43 wastewater, enabling interpretation of H5 RNA wastewater detections.

## 45 **Introduction**

46 Approximately 3-11% of the population in the United States is infected with influenza  
47 virus each year, and Influenza A virus (IAV) is responsible for the majority of these  
48 infections.<sup>1</sup> In recent years, wastewater monitoring of infectious diseases has emerged  
49 as a powerful tool for tracking trends in disease incidence in the community. Previous  
50 research has found that concentrations of total IAV genomic RNA in wastewater track  
51 closely with occurrence of infections in the contributing community.<sup>2-5</sup> IAV has subtypes  
52 that are classified by both hemagglutinin (H) and neuraminidase (N) proteins.<sup>6</sup> The H1  
53 and H3 subtypes are most common in humans and swine, while many subtypes,  
54 including H1, H3, H5, H7, H9, and H10, are common in avian populations.<sup>7</sup> Given that  
55 levels of total IAV (measurements that include all H subtypes) in wastewater have been  
56 closely correlated with human disease, and municipal wastewater primarily consists of  
57 anthropogenic inputs, the predominant source of IAV RNA in wastewater has thus far  
58 been considered to be human.

60 The highly pathogenic avian influenza (HPAI) A (H5N1) outbreak in birds began in the  
61 United States in February 2022 and has resulted in the deaths of millions of poultry and  
62 wild fowls.<sup>8</sup> This outbreak in poultry has prompted concerns about increased spillover

63 into humans and the possibility of future human to human transmission, as humans  
64 sporadically infected with H5N1 have experienced severe symptoms and high mortality  
65 in the past.<sup>9</sup> Other animal influenza strains have jumped from animal populations to  
66 humans through mutations, adaptation, or reassortment events with human influenzas,  
67 resulting in epidemics and pandemics.<sup>10,11</sup> This concern has grown as outbreaks of  
68 unknown illness in cattle in March 2024 were identified as infections caused by H5N1  
69 later that month. Between March 1 and December 19, 2024, 865 infected dairy cow  
70 herds and 61 human cases were reported in 16 states.<sup>12</sup> Human cases of H5N1 were  
71 reported mostly among those who worked in close proximity to dairy cows and poultry;  
72 human-to-human transmission has not been reported or suspected in any of the known  
73 cases.<sup>13-15</sup>

74  
75 Beginning in March 2024 and concurrent with cattle outbreaks, we detected the H5 IAV  
76 subtype genomic RNA (hereafter, H5 RNA) in wastewater in multiple sites across the  
77 United States.<sup>16</sup> Prior to the H5N1 outbreaks in cattle, contributions to wastewater from  
78 animals infected with H5N1 (such as poultry) were expected to be minimal. However,  
79 cows infected with H5N1 shed the virus in milk, and IAV RNA has been detected both in  
80 raw milk and in pasteurized milk available on store shelves.<sup>17,18</sup> Because of the food  
81 chain, a substantial amount of milk products enter sewers; it is estimated that 12% of  
82 milk available for sale is wasted at retailers and 20% by consumers after purchase.<sup>19</sup>  
83 Milk is commonly provided with breakfast and lunch to students at schools, and much of  
84 this milk is wasted as well. Studies report that 45% of milk was wasted at kindergarten  
85 and pre-kindergarten lunches,<sup>20</sup> and 13% by high school students.<sup>21</sup> This wasted milk  
86 may be disposed of down the drain, entering sewer systems and contributing detectable  
87 viral RNA to wastewater. Food industries are also often permitted to dispose of waste  
88 generated while processing dairy products into sewer systems. Contributions to  
89 wastewater from birds are less likely because of the lack of connection between wild  
90 bird habitats and domestic flocks to municipal sewer systems. However, wastewater  
91 sewer systems that accept stormflow (“combined sewers”) are less common but may  
92 receive fecal waste from wildfowl and other wild birds that mixes with runoff and enters  
93 sewer systems. Both poultry and wildfowl can shed IAV in their feces when infected.<sup>22,23</sup>  
94 Wastewater treatment plants with open-air settling tanks, or that accept waste from  
95 industries that generate standing water, may be susceptible to inputs of bird feces.  
96 Therefore, we conclude that any one of cow’s milk, poultry feces, wildfowl feces, or  
97 human contributions are the most likely sources of H5 in wastewater.

98  
99 In this study, we present findings from retrospective testing of wastewater solids for total  
100 IAV and H1, H3, and H5 IAV subtype RNA from September 2023 - May 2024 in a  
101 publicly owned treatment work (POTW) in California. We also present findings from a  
102 model developed to estimate the theoretical contributions of humans, cow milk, wildfowl

103 feces, and poultry feces to the wastewater system necessary to result in the observed  
104 H5 RNA concentrations. Our objectives were to 1) identify the timing of the first H5  
105 detection in the sewershed during a period with circulating human influenza and 2)  
106 develop and implement a model of theoretical sources of H5 into the wastewater system  
107 to contextualize our findings.

108

## 109 **Methods**

### 110 ***H1 and H3 Assay Design***

111 IAV H1 and H3 subtype genome sequences were downloaded from the National Center  
112 for Biotechnology Information (NCBI) in January 2023 (H1 genomes) and December  
113 2022 (H3 genomes) and supplemented with additional newer sequences available from  
114 NCBI and GISAID in April 2024. Sequences were aligned, and primers and probes were  
115 designed to target the hemagglutinin (HA) gene using Primer3Plus. Parameters used in  
116 assay development (e.g., sequence length and GC content) are provided elsewhere.<sup>24</sup>  
117 The primers and probes (Table S1) were confirmed to be specific and sensitive for  
118 influenza A containing the H1 and H3 subtypes of the HA gene *in silico* using NCBI  
119 BLAST.

120

121 The H1 and H3 assays were tested *in vitro* against nucleic acids from a large collection  
122 of respiratory pathogens including different influenza subtypes (Table S2). Nucleic acids  
123 from these panels were extracted and purified as described below for wastewater solids  
124 samples, then used as template in droplet digital RT-PCR assays. The panels were run  
125 in a single well using the same ddPCR methods described below and elsewhere.<sup>16,24</sup>

126

### 127 ***IAV M gene and H5 assays***

128 The H5 assay used has been described in detail elsewhere,<sup>16</sup> as has the M gene  
129 assay.<sup>24</sup> See the Supporting Information for information on primers, probes, and positive  
130 control material. The influenza M gene assay detects all IAV subtypes and hereafter,  
131 measurements made using the M gene assay will be interpreted as “total IAV RNA”.

132

### 133 ***Retrospective analysis of samples***

134 Biobanked nucleic-acid extracts obtained from wastewater solids samples collected  
135 between September 1, 2023 and May 13, 2024 from a POTW (Southeast San  
136 Francisco) were retrospectively analyzed for total IAV (M gene), H1, H3, and H5 (n=110  
137 samples). Nucleic-acids were stored between 1 and 10 months at -80°C before  
138 analysis. Samples consisted of grab samples of settled solids from the primary clarifier.  
139 Samples were collected using sterile methods and stored at 4°C prior to nucleic-acid  
140 extraction. The POTW is located in an urban area and serves 750,000 people, and  
141 services a geographic area with combined stormwater and sanitary sewer systems

142 meaning that stormwater and urban dry weather runoff (generated via irrigation or car  
143 washing, for example) may enter the POTW.

144  
145 Sample processing methods are described in detail elsewhere.<sup>24-26</sup> Briefly, nucleic acids  
146 were extracted from the solid fraction of each sample using the Chemagic Viral  
147 DNA/RNA 300 Kit H96 (PerkinElmer, Shelton, CT) followed by inhibition removal (Zymo  
148 OneStep PCR Inhibitor Removal Kit, Irvine, CA).<sup>25</sup> Nucleic-acid extraction occurred  
149 immediately within 24 h of sample collection. Between 0.5-1g of the dewatered solids  
150 were dried at 110°C for 19-24 h to determine the dry weight. Concentrations of total IAV  
151 (M gene), H1, H3, and H5 RNA were measured in multiplex using droplet digital 1-step  
152 RT-PCR (dd-RT-PCR) run on an AutoDG Automated Droplet Generator (Bio-Rad,  
153 Hercules, CA), Mastercycler Pro (Eppendorf, Enfield, CT) thermocycler, and a QX600  
154 Droplet Reader (Bio-Rad). Ten ddPCR replicates were run for each sample. Only wells  
155 with over 10,000 droplets were included; all wells met this criterion. Extraction and PCR  
156 positive and negative controls were run on each 96-well plate. Positive controls  
157 consisted of Twist synthetic controls (M gene, H1, H3) and custom gene blocks (H5;  
158 IDT); see the SI for full details. Negative controls consisted of no template controls  
159 (NTC) containing nuclease free water. Bovine coronavirus (BCoV) was spiked into  
160 samples and measured as an internal control, and pepper mild mottle virus (PMMoV)  
161 was measured using ddPCR as an endogenous internal control. We used the  
162 QuantaSoft Analysis Pro software (Bio-Rad) to threshold droplets, and a sample had to  
163 have 3 or more positive droplets to be considered positive. Three positive droplets  
164 corresponds to a concentration between 500-1000 copies/g. Values were converted to  
165 gene copies/dry g using dimensional analysis. See the SI for reaction chemistry and  
166 cycling parameters.

167  
168 ***Model of theoretical inputs***

169 We developed a model to estimate the H5 RNA inputs into the system that would be  
170 required to result in the measured H5 RNA concentrations in wastewater solids. We  
171 considered inputs from humans, cow milk, poultry feces, and waterfowl feces, as each  
172 input type had a plausible mechanism for entering wastewater. We note that these  
173 inputs may enter wastewater in a number of ways, including from household uses,  
174 businesses, industrial discharges, and, in some cases, environmental sources.

175

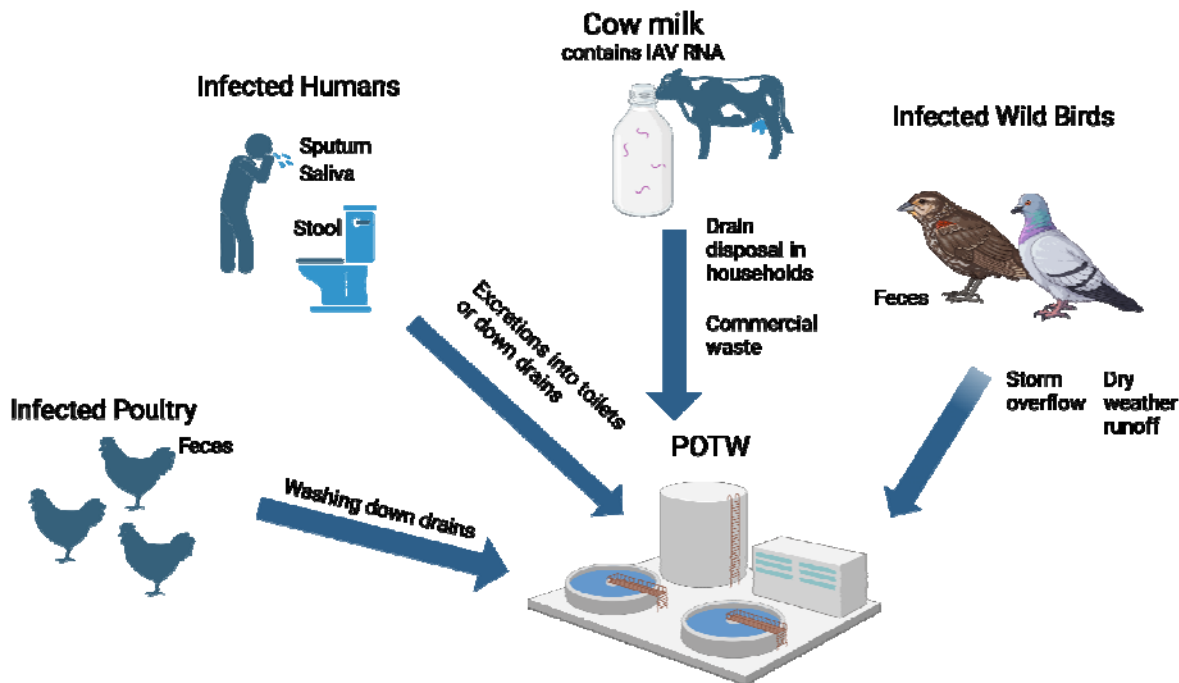

176  
177 **Figure 1.** Conceptual image of sources of H5N1 to the POTW.  
178

179 *Mass Balance*

180 We assume that the concentrations measured in wastewater relate to inputs from  
181 humans, birds, and cow's milk according to the following equation:

182  
183 where  $F_{H5}$  indicates the daily flux of H5 RNA (gene copies/day) through the POTW  
184 and  $F_H$ ,  $F_P$ ,  $F_W$ , and  $F_M$  indicate the daily contribution (gene  
185 copies/day) of humans, poultry, wild birds, and milk, respectively, to the POTW.  
186

187 *Calculations of daily H5 wastewater fluxes,*

188 We assume that both the liquid and solid portions of wastewater contain H5 RNA when  
189 detected in solids and calculate total H5 RNA content across both phases. The  
190 concentration in liquids is calculated using the Freundlich isotherm:<sup>27</sup>

191 where  $C_L$  indicates the H5 RNA concentration in liquids (gene copies/mL),  $C_S$  indicates  
192 the H5 RNA concentration in solids (gene copies/dry gram), and  $K$  indicates the  
193 Freundlich partitioning coefficient (mL/dry gram).  
194

195 Total daily H5 RNA flux through the POTW (gene copies/day) is calculated as the sum  
196 of H5 RNA in solids (gene copies/day) and in liquids (gene copies/day). We obtain the  
197 daily flow rate (in millions of gallons per day) and total suspended solids (TSS; mg/L)



198 from the POTW for each day. The total daily flux of solids through the POTW is  
199 calculated as:

$$M_s = \frac{F_{L_{day}} \times TSS}{10^3} \#3$$

200 where  $F_{L_{day}}$  is the daily flow rate in terms of L/day, TSS is the total suspended solids  
201 (mg/L), and the  $10^3$  factor is to convert from mg/day to g/day. The daily flux of H5 RNA  
202 in the solids (gene copies/day) is calculated by:

$$H5_s = M_s \times C_s \#4$$

203

204 The daily flux of H5 RNA in the liquids (gene copies/day) is calculated by:

$$H5_l = F_{L_{day}} \times C_l \#5$$

205

206 The total daily flux of H5 RNA through the POTW (gene copies/day) is calculated by:

$$F_{wwtp,d} = H5_s + H5_l \#6$$

### 207 *Human inputs*

208 We consider human contributions to the POTW from saliva, sputum, and feces, such  
209 that:

$$F_{human,d} = N_{human,d} \times (C_f \times V_f \times FS_f + C_{sp} \times V_{sp} \times FS_{sp} + C_{sal} \times V_{sal} \times FS_{sal}) \#7$$

210 where  $N$  indicates the number of infected people contributing to wastewater,  $C$  indicates  
211 concentration in that excretion type (gene copies per mL or per g),  $V$  indicates volume  
212 of that excretion type entering the wastewater system per day per person (mL or g), and  
213  $FS$  indicates the fraction of infected persons shedding influenza by that route (unitless).  
214  $F$  refers to feces,  $sp$  refers to sputum, and  $sal$  refers to saliva.

215

216 Assuming no contribution to the POTW from birds or milk, we can simplify Eq. 1 to:

$$F_{wwtp,d} = F_{human,d} \#8$$

217

218 and, plugging in Eq. 7:

$$F_{wwtp,d} = N_{human,d} \times (C_f \times V_f \times FS_f + C_{sp} \times V_{sp} \times FS_{sp} + C_{sal} \times V_{sal} \times FS_{sal}) \#9$$

219

220 Rearranging to solve for the number of infected individuals ( $N$ ):

$$N_{human,d} = \frac{F_{wwtp,d}}{C_f \times V_f \times FS_f + C_{sp} \times V_{sp} \times FS_{sp} + C_{sal} \times V_{sal} \times FS_{sal}} \#10$$

221

### 222 *Poultry inputs*

223 We consider inputs from poultry to the POTW through feces:

$$F_{poultry,d} = N_{poultry,d} \times (C_{CS} \times CF_{SG} \times V_f) \#11$$

224

225 Where  $C_{CS}$  indicates the concentration of influenza reported in cloacal swabs collected  
226 from domestic poultry (gene copies/swab),  $CF_{SG}$  indicates a conversion factor from

227 concentration/swab to concentration/g (swab/gram), and  $V_f$  indicates the volume of  
228 feces produced by birds per day (grams).

229

230 Assuming no contribution to the POTW from humans or milk, we can simplify Eq. 1 to:

$$F_{wwtp,d} = F_{poultry,d} \#12$$

231 and, plugging in Eq. 11:

$$F_{wwtp,d} = N_{poultry,d} \times (C_{CS} \times CF_{SG} \times V_f) \#13$$

232

233 Rearranging to solve for the number of infected birds ( $N$ ):

234

$$N_{poultry,d} = \frac{F_{wwtp,d}}{C_{CS} \times CF_{SG} \times V_f} \#14$$

236

237 *Wild bird inputs*

238 We consider inputs from wild birds to the POTW through feces:

$$F_{bird,d} = N_{bird,d} \times (C_{CS} \times CF_{SG} \times V_f) \#15$$

239

240 Where  $C_{CS}$  indicates the concentration of influenza reported in cloacal swabs collected  
241 from domestic poultry (gene copies/swab),  $CF_{SG}$  indicates a conversion factor from  
242 concentration/swab to concentration/g (swab/gram), and  $V_f$  indicates the volume of  
243 feces produced by birds per day (grams).

244

245 Assuming no contribution to the POTW from humans or milk, we can simplify Eq. 1 to:

$$F_{wwtp,d} = F_{bird,d} \#16$$

246 and, plugging in Eq. 15:

$$F_{wwtp,d} = N_{bird,d} \times (C_{CS} \times CF_{SG} \times V_f) \#17$$

247

248 Rearranging to solve for the number of infected birds ( $N$ ):

249

$$N_{bird,d} = \frac{F_{wwtp,d}}{C_{CS} \times CF_{SG} \times V_f} \#18$$

250

251 *Cow milk inputs*

252 We estimate the daily flux of H5 RNA from cow milk (gene copies/day) by:

253

$$F_{milk,d} = C_{MILK} \times V_{MILK} \times CF_{milk} \#19$$

254

255 where  $C_{MILK}$  refers to the H5 concentration in cow's milk,  $V_{MILK}$  indicates the volume of  
256 milk entering the wastewater system per day, and  $CF_{milk}$  is a conversion factor from the  
257 EID50/mL units  $C_{MILK}$  is reported in to gene copies/mL units.



258  
 259 Assuming no contribution to the POTW from humans or birds, we can simplify Eq. 1 to:

$$F_{wwtp,d} = F_{milk,d} \quad \#20$$

260 and, plugging in Eq. 19:

$$F_{wwtp,d} = C_{MILK} \times V_{MILK} \times CF_{milk} \quad \#21$$

261 Rearranging to solve for the daily volume of infected milk entering the POTW:

$$V_{MILK} = \frac{F_{wwtp,d}}{C_{MILK} \times CF_{milk}} \quad \#22$$

262  
 263 *Data Sources*

264 Using previously published systematic reviews and parameters on daily human waste  
 265 input into the system, we identified a distribution of human IAV shedding into  
 266 wastewater per day per infected individual (**Table 1**).<sup>28,29</sup> For cow milk, we identified a  
 267 distribution of H5N1 RNA per gallon of pasteurized milk using published reports on  
 268 H5N1 EID50 content in pasteurized cow milk<sup>17,18</sup> and a conversion from EID50 to RNA  
 269 gene copies.<sup>30</sup> Distributions of daily H5 RNA shedding in the feces of poultry and  
 270 waterfowl were separately estimated from studies reporting IAV shedding in each bird  
 271 type (**Table S4**).<sup>22,23</sup> Blue-winged teal were used as the model species for wild birds,  
 272 per Humphreys *et al.*<sup>31</sup> Raw data for empirical distributions are provided in the Stanford  
 273 Digital Repository (<https://purl.stanford.edu/ks454rq5640>).

274  
 275 **Table 1.** Model parameters for human wastewater inputs

| Category                       | Parameter                                   | Unit                      | Distribution         | Parameters                                   | Reference |
|--------------------------------|---------------------------------------------|---------------------------|----------------------|----------------------------------------------|-----------|
| <b>HUMANS</b>                  |                                             |                           |                      |                                              |           |
| <i>HUMAN WASTEWATER INPUTS</i> |                                             |                           |                      |                                              |           |
| Sputum                         | mL sputum produced to sewer per person      | mL / day                  | Uniform              | min = 0.1, max = 1                           | 29        |
| Saliva                         | tooth brushing events/day                   | Tooth brushing events/day | Discrete             | [(0,0.02),(1,0.29),(2,0.55),(3+,0.14)]       | 29        |
| Saliva                         | mL saliva to sewer per tooth brushing event | mL/Tooth brushing event   | Point                | 1                                            | 29        |
| Stool                          | stool production per day per person         | Log g/day                 | Truncated Log Normal | meanlog = 4.763, sdlog=0.471, min=0, max=520 | 29        |

|                                  |                                                          |          |                  |                                                                                       |                                                                                                       |
|----------------------------------|----------------------------------------------------------|----------|------------------|---------------------------------------------------------------------------------------|-------------------------------------------------------------------------------------------------------|
| Urine                            | urine production per day per person                      | L/day    | Gamma            | $\alpha$ (shape)=5.315, $\beta$ (scale)=0.25, and a (positive) offset $\Delta$ of 0.5 | 29                                                                                                    |
| <b>HUMAN SHEDDING</b>            |                                                          |          |                  |                                                                                       |                                                                                                       |
| Sputum                           | gene copies of influenza in sputum                       | gc / mL  | Empirical        |                                                                                       | 28                                                                                                    |
| Saliva                           | gene copies of influenza in saliva                       | gc / mL  | Empirical        |                                                                                       | assume equivalent to sputum shedding, per findings by Crank <i>et al</i> for SARS-CoV-2 <sup>29</sup> |
| Stool                            | gene copies of influenza in stool                        | gc / g   | Empirical        |                                                                                       | 32–35                                                                                                 |
| Urine                            | gene copies of influenza in urine                        | gc / mL  | Point            | 0                                                                                     | assumption                                                                                            |
| <b>HUMAN FRACTIONAL SHEDDING</b> |                                                          |          |                  |                                                                                       |                                                                                                       |
| Sputum                           | fraction of infected people shedding influenza in sputum | unitless | Uniform          | min = 0.73, max = 1                                                                   | Calculated from data in Lowry, Wolfe, & Boehm <sup>28</sup>                                           |
| Saliva                           | fraction of infected people shedding influenza in saliva | unitless | Uniform          | min = 0.85, max = 1                                                                   | Calculated from data in Lowry <i>et al.</i> <sup>28</sup>                                             |
| Stool                            | fraction of infected people shedding influenza in stool  | unitless | Truncated normal | mean = 0.40, sd = 0.21; min = 0, max = 1                                              | Calculated from data in Lowry <i>et al.</i> <sup>28</sup>                                             |
| Urine                            | fraction of infected people shedding influenza in urine  | unitless | Uniform          | min = 0.05, max = 1                                                                   | Assumption based on Lowry <i>et al.</i> <sup>28</sup>                                                 |

| <b>COW MILK</b>               |                                                   |                  |                     |                                                          |                                                              |
|-------------------------------|---------------------------------------------------|------------------|---------------------|----------------------------------------------------------|--------------------------------------------------------------|
| milk                          | H5 concentration in commercial (pasteurized) milk | log10 EID50 / mL | Truncated lognormal | Mean = 5.93, sd = 2.63, min = 0, max = $2.5 \times 10^5$ | Calculated from <sup>17,18</sup>                             |
| milk                          | conversion from EID50 to gc                       | gc / EID50       | Uniform             | Min = 10, max = 25                                       | <sup>30</sup>                                                |
| milk                          | conversion from mL to gallons                     | mL/gallon        | Point               | 3785.41253                                               | constant                                                     |
| <b>POULTRY AND WILD BIRDS</b> |                                                   |                  |                     |                                                          |                                                              |
| poultry                       | H5 concentration , cloacal swabs                  | Log10 gc / swab  | Log10 normal        | mean = 4.6, sd = 1.6                                     | Extracted from Fig 3 for chickens <sup>23</sup>              |
| waterfowl                     | H5 concentration , cloacal swabs                  | Log10 gc / swab  | Log10 normal        | mean = 3.68, sd = 1.0                                    | <sup>22</sup>                                                |
| both                          | mass feces per cloacal swab                       | g / swab         | Uniform             | min = 0.05, max = 0.2                                    | assumption                                                   |
| both                          | conversion factor - swab to g                     | swab / g         | Point               | 1 / mass_feces_cloacal_swab                              | Conversion factor                                            |
| poultry                       | daily amount of bird poop / bird, g               | g / day          | Uniform             | min = 130, max = 184                                     | assumption from values in Tanczuk <i>et al</i> <sup>36</sup> |

|           |                                     |          |         |                      |                               |
|-----------|-------------------------------------|----------|---------|----------------------|-------------------------------|
| waterfowl | daily amount of bird poop / bird, g | g / day  | Uniform | min = 5.7, max = 8.7 | Calculated from <sup>37</sup> |
| both      | fractional shedding                 | unitless | Point   | 1                    | assumption                    |

276  
 277 To estimate the total daily H5 RNA for the POTW, we calculated total solids and total  
 278 liquids at the POTW per day using the flow rate and total suspended solids (TSS)  
 279 reported by the POTW. We assumed homogeneity in both solids and liquids, meaning  
 280 that the quantity of H5 RNA measured in the solids sample is the same throughout all  
 281 solids passing through the system. The H5 RNA concentration in liquids was estimated  
 282 from the solids using the partitioning coefficient of IAV RNA in wastewater and the  
 283 adsorption intensity (**Table 2**).<sup>27</sup> We summed the total H5 RNA in solids and total H5  
 284 RNA in liquids to calculate the total H5 RNA at the POTW per day.

285  
 286 **Table 2.** Wastewater model input parameters

| Category   | Parameter                             | Unit     | Distribution | Parameters           | Reference     |
|------------|---------------------------------------|----------|--------------|----------------------|---------------|
| wastewater | solid-liquid partitioning coefficient | mL / g   | Empirical    |                      | <sup>27</sup> |
| wastewater | Adsorption intensity                  | unitless | Uniform      | min = 0.7, max = 1.9 | <sup>27</sup> |

287  
 288 Raw data were fit to distributions using the *fitdistr* package in R. For each parameter,  
 289 we first used the *descdist* function to create a Cullen and Fray graph, which plots the  
 290 square of skewness against kurtosis. The value from the observed data is plotted, as  
 291 are the locations of theoretical distributions. Whichever theoretical distribution the  
 292 observation is plotted nearest is selected as the distribution type, with the beta  
 293 distribution being the lowest priority (meaning if the observation is near normal, uniform,  
 294 exponential, or logistic, while still being located within the beta region, the other non-  
 295 beta distribution is selected). After selecting a distribution type, data were fitted to the  
 296 distribution using the *fitdistr* package and distribution parameters were extracted.

297  
 298 *Model Approach*

299 In the models, we assumed that the measured H5 RNA in wastewater originated  
 300 entirely from one of the four input types and then independently calculated (1) the  
 301 number of infected humans in the sewershed, (2) the liters of milk input into the sewer,

302 (3) the number of poultry contributing feces to the sewer, and (4) the number of  
303 waterfowl contributing feces to the sewer that would be required to result in the  
304 measured H5 concentration. By looking at each source independently, we can estimate  
305 an upper bound on the number of infected individuals or IAV-impacted liters of milk that  
306 could be contributing to the system. To assess variability in our parameter estimates,  
307 we conducted Monte Carlo simulations using  $n=10,000$  iterations. For each iteration, we  
308 randomly selected a value from each parameter's distribution and conducted the  
309 calculations. Presented throughout are the median and interquartile range (25th - 75th  
310 percentile) from these simulations. Due to the limited data available for our  
311 assumptions, we are reporting order of magnitude results.

312

### 313 *Sensitivity Analysis*

314 We use a previously-published method to conduct a sensitivity analysis to determine  
315 which parameters the model is most sensitive to.<sup>38,39</sup> The model is run with the  
316 parameter first set to its 25th percentile (p25) then set to the 75th percentile (p75) while  
317 all other parameters are set to their median value. We calculate the ratio between the  
318 model output for p75/p25. A p75:p25 ratio of 1 indicates that the model is not sensitive  
319 to the parameter, while a ratio above or below indicates the model is sensitive to that  
320 parameter. For ratios below 1, we calculated the inverse ( $1/p75:p25$ ) so that all ratios  
321 are presented on a comparable scale.

322

### 323 *Shiny Application*

324 We developed an application using the R Shiny package to make the model available  
325 for public use. Users can input the H5 wastewater concentration in solids (gene  
326 copies/dry g) and the flow rate (in millions of gallons [MGD] per day) and total  
327 suspended solids (TSS; mg/L) at the treatment plant. The model will conduct  $n=50,000$   
328 iterations and provide estimates of the required inputs. The Shiny app is available at  
329 [https://abharv52.shinyapps.io/h5\\_input\\_estimates/](https://abharv52.shinyapps.io/h5_input_estimates/).

330

### 331 *Identifying food and/or agricultural industries within the sewershed*

332 We used multiple online sources to search for potential industrial contributors of dairy  
333 products to the sewershed wastewater. We searched google maps for dairy, cheese, or  
334 butter processing facilities and cross-checked locations with the sewershed boundaries  
335 to see if they fell within the sewershed. The boundary shapefile was provided by the  
336 POTW. We also searched the Enforcement and Compliance History Online (ECHO)  
337 database for facilities with Clean Water Act permits with a Standardized Industry Code  
338 (SIC) indicating dairy processing (**Table S5**).

339

340

341 **Results**

342 ***H1 and H3 assay performance and QA/QC***

343 Both *in silico* and *in vitro* testing indicated the H1 and H3 assays are 100% specific. *In*  
344 *vitro* tests returned non-detects for all non-target pathogens, including other influenza  
345 subtypes.

346  
347 The Environmental Microbiology Minimal Information (EMMI)<sup>40</sup> and McClary-Gutierrez  
348 et al. guidelines<sup>41</sup> were used for reporting results (both checklists available at  
349 <https://purl.stanford.edu/ks454rq5640>). Positive and negative controls performed as  
350 expected. Nucleic acid extraction efficiency in samples exceeded the quality control  
351 threshold of 0.1 for bovine coronavirus (median = 1.8, interquartile range (IQR) = 1.2 -  
352 2.4); recoveries greater than one are likely a result of errors associated with the  
353 measurement of bovine coronavirus seeded into the sample. PMMoV was detected at  
354 high concentrations in all samples (median of  $6.1 \times 10^8$ , IQR =  $4.8 \times 10^8$ - $7.9 \times 10^8$  cp/g)  
355 providing further support of efficient nucleic-acid extraction

356

357 ***H5 RNA detection in wastewater samples***

358 H5 RNA was first detected at the POTW on March 18, 2024 (**Fig 2**). Between March 18  
359 and May 13 (the final sample of this study), 13 of 25 (52%) samples tested positive for  
360 H5 RNA. The median concentration detected was 2410 gc/dry g, with the peak  
361 concentration detected on May 3 (19,000 gc/dry g). H5 RNA detections were not related  
362 to rainfall patterns in the region (**Fig S1**).

363



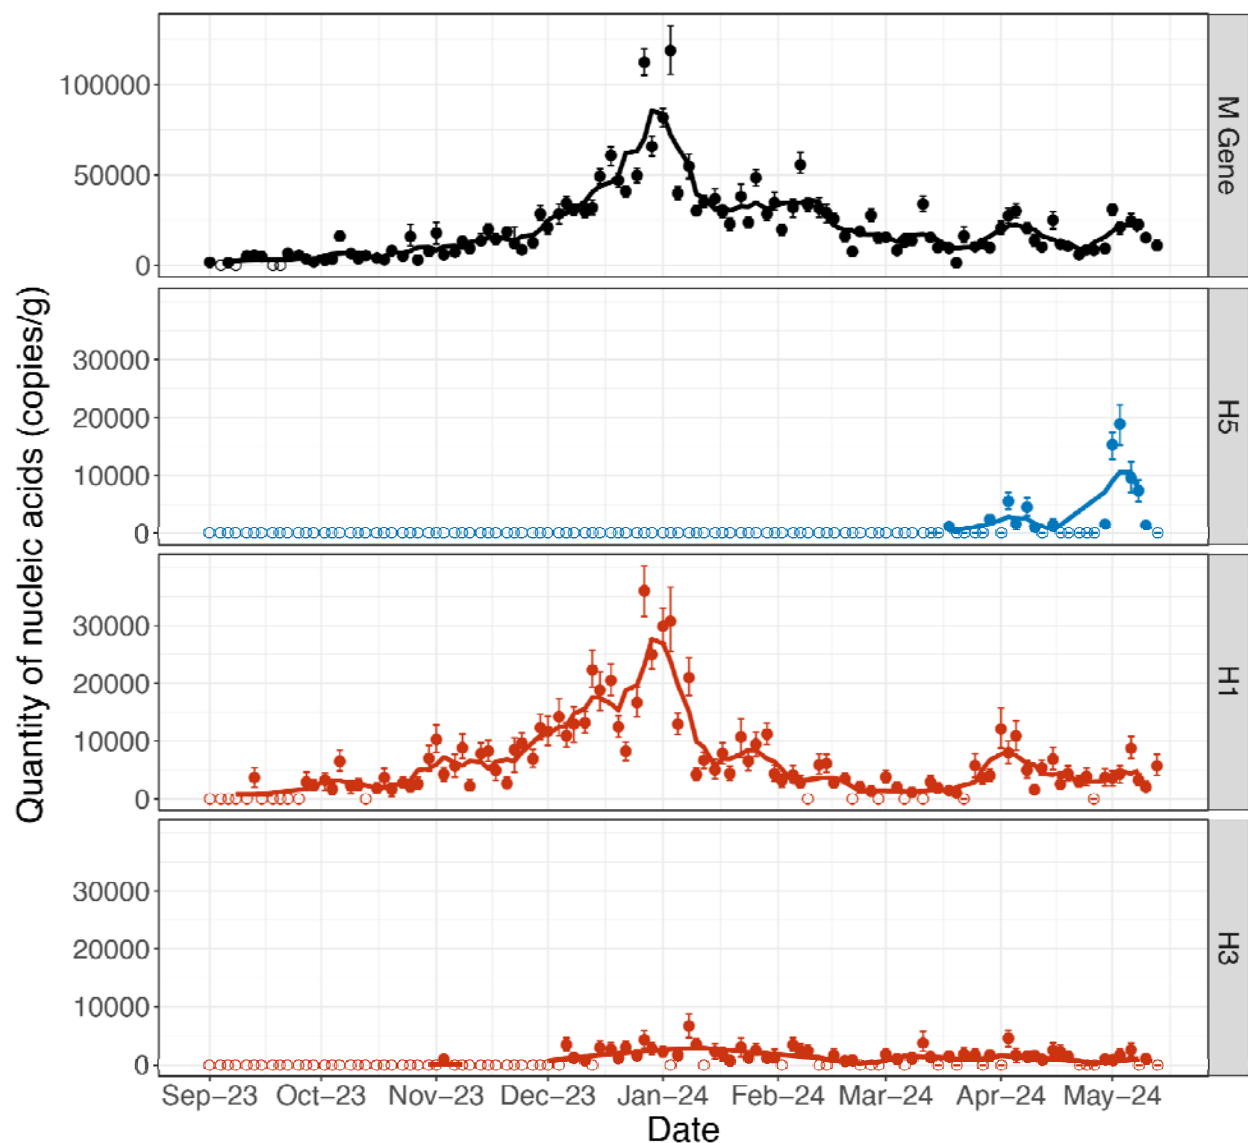

364  
365  
366  
367  
368  
369  
370  
371  
372  
373  
374  
375  
376  
377

**Figure 2.** Concentrations of influenza A M gene (all IAV), H5, H1, and H3 RNA in wastewater solids. Concentrations measured are indicated by filled circles with the 68% confidence interval represented by bars. Samples with no detection are indicated by open circles. The lines represent the 5-adjacent sample trimmed average.

Both total IAV (M gene) and H1 RNA were regularly detected throughout the sampling period, and concentrations of both peaked in late December 2023 (**Fig 2**). H3 RNA was regularly detected from December 2023 onwards. H1 and H3 RNA concentrations remained low during H5 RNA detections from March through May. Of clinical influenza cases reported in CA during the 2023-2024 season, over 70% of cases were H1N1 (**Fig S2**)<sup>42</sup>.

378 **Modeled sources of H5 RNA**

379 We calculated the total gene copies of H5 theoretically contributed to wastewater per  
380 infected human, liter of milk, and in daily fecal production in poultry and wild birds  
381 (**Table 3**). The estimated required inputs per source varied with measured H5 RNA  
382 concentrations (**Figure 3**). Overall, the lower bound (25th percentile) of contributions  
383 required to result in the median measured H5 RNA concentration were  $10^4$  liters of milk,  
384  $10^4$  infected humans,  $10^2$  infected poultry, or  $10^5$  infected wild birds.  
385

**Table 3.** Median gene copies of H5 RNA contributed to wastewater per day per infected individual (person, poultry, waterfowl) or per liter (IAV RNA containing milk).

| Source        | Percentile      |                 |                 |
|---------------|-----------------|-----------------|-----------------|
|               | 25              | 50 (median)     | 75              |
| Person        | $2 \times 10^6$ | $9 \times 10^6$ | $3 \times 10^7$ |
| Liter of Milk | $7 \times 10^4$ | $4 \times 10^5$ | $2 \times 10^6$ |
| Poultry       | $5 \times 10^6$ | $6 \times 10^7$ | $6 \times 10^8$ |
| Waterfowl     | $9 \times 10^4$ | $3 \times 10^5$ | $1 \times 10^6$ |

386

387

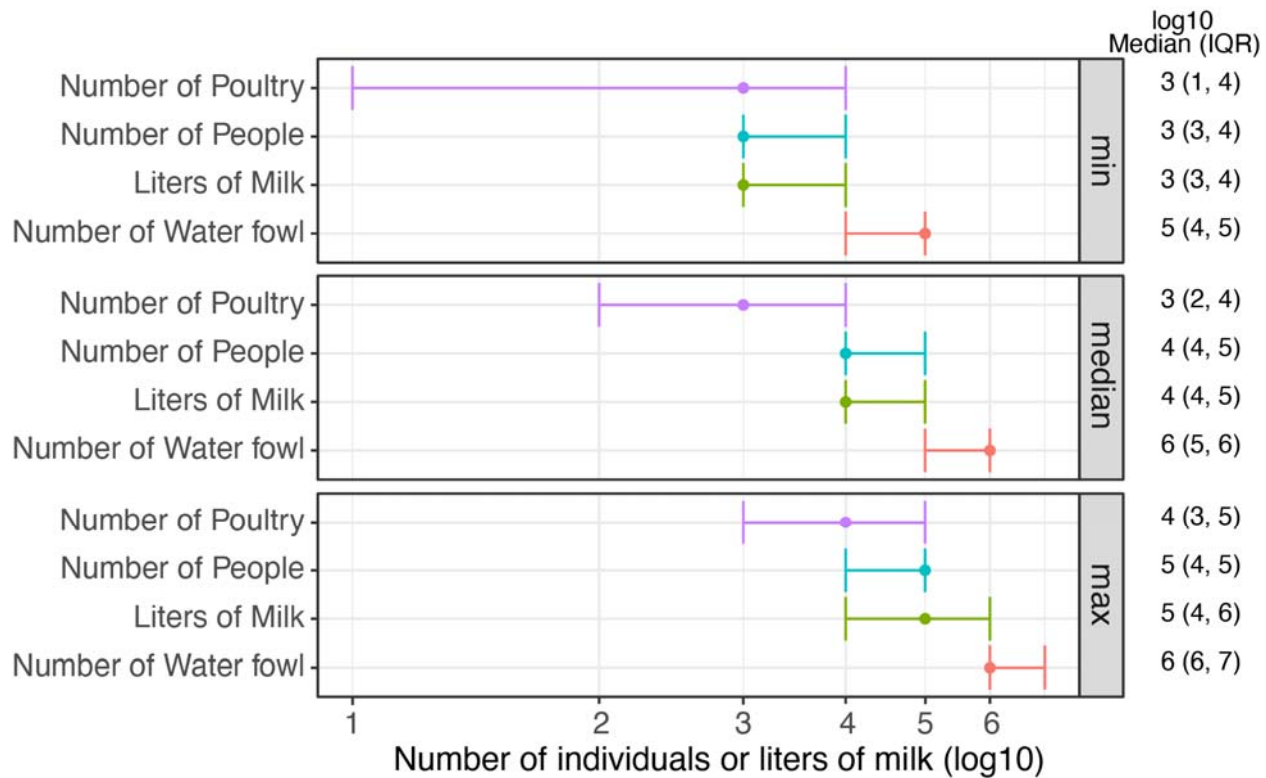

388

389

390

391

392

393

394

395

396

397

398

399

400

**Figure 3.** Median and IQR (25th - 75th quantile) of number of infected individuals required (humans, poultry, waterfowl) or liters of milk required to result in the lowest non-zero, median, and maximum H5 concentration measured at the POTW.

The peak H5 RNA concentration was detected on May 3, 2024; for this concentration (19,000 gc/dry g), the lower bound (25th percentile) required contributions were  $10^4$  liters of milk,  $10^4$  infected humans,  $10^3$  infected poultry, or  $10^6$  infected waterfowl.

### *Sensitivity Analysis*

The H5 input model is very sensitive to the concentrations of IAV in poultry and waterfowl cloacal swabs, the concentration of influenza RNA in cow milk, and the concentration of influenza in human saliva (**Fig 4**).

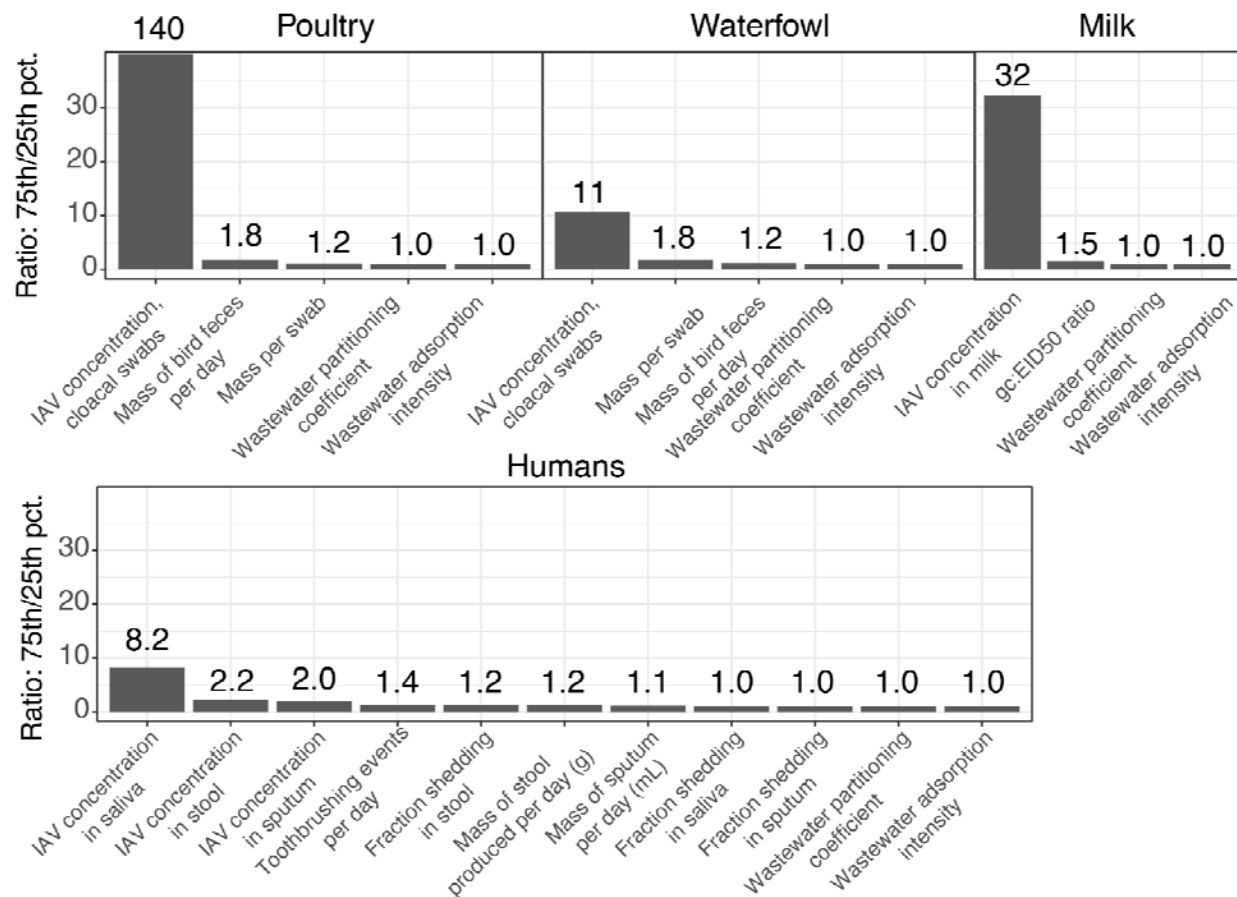

401  
 402 **Figure 4.** Sensitivity analysis results. Presented are the ratios of model output between  
 403 the 75th and 25th percentiles for each parameter while all other parameters are set to  
 404 their median value.

405  
 406 **Possible sources of animal inputs into the wastewater system**

407 We identified two dairy processing facilities in the sewershed: a cheese making  
 408 business and a butter creamery. We were not able to determine the volume of waste  
 409 output from these businesses or whether their waste entered the sewer system.  
 410 Given that an estimated 20% of milk is wasted in residential settings,<sup>19</sup> an estimated  
 411 daily milk consumption per capita of 118 mL,<sup>43</sup> and a sewershed population of 750,000,  
 412 we estimate that approximately 22,000 liters of milk are wasted per day in households in  
 413 the sewershed. This is a conservative estimate, not accounting for waste in  
 414 pasteurization, dairy products, food service, or at retail stores (of which an estimated  
 415 15% is wasted<sup>19</sup>).

416  
 417 We also located one live bird market in the sewershed where poultry are kept alive and  
 418 where poultry feces enter the sewershed via drains in the establishment. The market  
 419 operates on select dates and birds are typically housed at the market for a maximum of  
 420 24 hours before being sold; thousands of birds can be present at any one time.

421

## 422 **Discussion**

423 We first detected H5 RNA in San Francisco wastewater in mid-March 2024 after H5N1  
424 outbreaks in cows had been identified in the United States but before any outbreaks  
425 had been reported in California. Samples from September 2023 to mid-March 2024  
426 were all non-detect for H5 RNA, despite regular detection of the influenza A M gene and  
427 known outbreaks of H5N1 in domestic poultry and wild birds in the region.<sup>8</sup> The timing of  
428 the initial H5 RNA detections generally aligned with detections of H5 RNA in wastewater  
429 from Amarillo, TX (with detections late February to late April in the South plant and  
430 detections from mid-March to late April in the North plant) and Dallas, TX (detections  
431 mid-March to mid-April).<sup>16</sup> However, while dairy cow herds were identified with H5N1  
432 illness in Texas during this time, none were identified in California until late August  
433 2024.<sup>44</sup> High concentrations of H5 RNA were detected in wastewater from dairy  
434 industries discharging to the wastewater system in Amarillo, TX,<sup>16</sup> while no major dairy  
435 operations of similar scale were identified in the San Francisco sewershed. H5N1  
436 outbreaks in poultry flocks were reported in San Francisco (May 9, 2024) within the time  
437 period of wastewater H5 RNA detections. As such, the source of H5 RNA in wastewater  
438 in San Francisco is unclear based on circumstantial evidence and we implemented a  
439 modeling approach to determine the feasibility of different H5 influenza sources to the  
440 sewer system producing these results. We found the model helpful to estimate the order  
441 of magnitude contributions that may be required from different pathways; however, data  
442 on shedding and other assumptions means that the ability of the model to make precise  
443 estimates is limited.

444

445 **Waterfowl.** Based on the model results, waterfowl are unlikely to be a major source of  
446 H5 RNA to wastewater from the SF sewershed. Feces from at least ten thousand of  
447 these infected birds would be required to result in the minimum H5 RNA concentration  
448 measured, and there is unlikely to be a feasible way for the required mass of bird feces  
449 to enter the system despite it being a combined system in which some contribution is  
450 likely. This analysis was limited by a lack of data on wild bird fecal shedding of  
451 influenza. In California in 2024, waterfowl such as geese as well as owls, gull, falcons,  
452 and other types of wild birds have all tested positive for H5N1.<sup>45</sup> Our shedding data was  
453 based on a study in blue-winged teals,<sup>22</sup> which are considered representative of  
454 waterfowl.<sup>31</sup> Influenza shedding in other types of birds with confirmed H5N1 in California  
455 are sparse.<sup>23</sup> It is possible that other species of wildfowl could shed greater quantities of  
456 IAV in feces or produce much greater quantities of feces. However, the mechanisms  
457 through which wild bird feces enter the wastewater system are limited, and the model  
458 assumes all feces produced are entering the system. Stormwater or urban runoff  
459 entering the combined system could wash bird feces into the system, yet there were no  
460 precipitation events recorded in San Francisco during the period of H5 RNA detections.

461 Bird feces could enter the system through bodies of standing water that drain to the  
462 system, yet none were identified within the sewershed.

463  
464 **Poultry.** Poultry are a feasible contributor of H5 to the SF sewer system, especially  
465 given the live bird market located within the sewershed where chicken feces can be  
466 washed into the sanitary sewer system. Notably, poultry at the live bird market infected  
467 with H5N1 were identified on May 9, 2024,<sup>8</sup> during the study period and coinciding with  
468 an H5 RNA wastewater detection. The USDA describes that the outbreak involved 700  
469 birds;<sup>8</sup> this number is within the IQR of the modeled number of poultry required for both  
470 the minimum and median H5 RNA concentrations measured in wastewater. Based on  
471 the author's observation, we estimate that the bird market may house as many as 3,000  
472 birds at one time, which is within the lower IQR (25th percentile) for the number of  
473 infected poultry required to result in the maximum H5 concentration measured.  
474 However, there were additional H5 detections after the May 2024 outbreak and it is  
475 unlikely that such a large number of H5N1-infected birds could go undetected.  
476 Outbreaks of highly pathogenic avian influenza (HPAI), which includes H5N1, result in  
477 severe morbidity and mortality in affected flocks. An early sign of HPAI is often  
478 unexpected chicken deaths, and common symptoms in chickens are severe and would  
479 be difficult to miss.<sup>46</sup> On Dutch poultry farms, the time between virus introduction and  
480 final mortality within individual chicken flocks ranged from 5 - 12 days,<sup>47</sup> signifying rapid  
481 spread through flocks. We saw sustained detection of H5 RNA in wastewater across 5  
482 weeks in the POTW, which would require that chickens at the live bird market be  
483 consistently infected with H5N1 during this time period if the market were the sole or  
484 primary H5 RNA wastewater source.

485  
486 The poultry model is very sensitive to poultry fecal shedding. Our model uses fecal  
487 shedding estimates for HPAI from a meta-analysis that incorporates data from 71  
488 studies, including 25 studies specific to H5N1.<sup>23</sup> The presentation of H5N1 in poultry in  
489 the U.S. since the beginning of the outbreak in 2022 has been similar to H5N1  
490 outbreaks in poultry in other regions;<sup>46</sup> as such, we feel that we are using the best  
491 available estimates of poultry fecal shedding.

492  
493 **Milk.** We find that milk is feasible as a primary or sole H5 RNA source to the POTW, but  
494 only if the milk supply is widely contaminated. Pasteurization of milk inactivates IAV, but  
495 does not reduce the IAV RNA concentration in milk which is still detectable by PCR.<sup>48-50</sup>  
496 Residential milk waste could drive H5 RNA detections; even for the maximum H5 RNA  
497 wastewater concentration, the lower bound model output (25th percentile) requires  
498 10,000 liters of contaminated milk to enter the sewer system. This is within our  
499 conservative estimate of the amount of milk wasted residentially each day in the  
500 sewershed (22,000 liters) not including the contribution of small dairies, retailers, and



501 food service, and so it is possible that dumping of contaminated milk could result in the  
502 detected H5 RNA if there was widespread contamination of milk at retailers within SF.

503

504 This analysis was limited by the availability of data on H5 and IAV concentrations in  
505 milk. No H5 or IAV containing milk was reported in milk processed in California during  
506 the time of this study,<sup>17,51</sup> although testing was limited (Tarbuck *et al.*: n=3, Suarez *et al.*,  
507 n=6), and no infected dairy cows were reported in California during the time period of  
508 this study.<sup>44</sup> However, it is possible that contaminated milk may enter the supply chain in  
509 San Francisco through either unidentified local cattle outbreaks or through milk  
510 processed in other locations with H5N1 outbreaks in dairy cattle. The model is sensitive  
511 to the H5 concentration in milk, and thus our input estimates would be affected by an  
512 over- or underestimation of the H5 concentration in milk.

513

514 **Humans.** Infected humans are unlikely to be a major contributor of H5 RNA to the San  
515 Francisco wastewater. As of December 19, 2024, only 61 people in the United States  
516 have been identified with H5N1 infections, and these cases were mostly in people who  
517 worked closely with infected cows or poultry.<sup>12</sup> Human-to-human transmission of H5N1  
518 is not suspected at this time. While it is possible that asymptomatic or undiagnosed  
519 cases exist and the true number of infections is higher,<sup>52</sup> there is no evidence to support  
520 the likelihood of widespread infection in humans at this time - especially  $10^3$  cases as  
521 the model estimates would be required to produce the minimum H5 concentration.<sup>13</sup>

522

523 Our estimates of the required H5 human cases are constrained by available human IAV  
524 shedding data, and do not necessarily align with previous observations of influenza A in  
525 wastewater during outbreaks in humans. The shedding data are based on human  
526 shedding of influenza A overall (no subtyping conducted), H1N1, H3N2, or H7N9,<sup>28</sup> and  
527 data on H5N1 shedding in humans are not available. No information is available on  
528 human IAV shedding of any subtype in urine.<sup>28</sup> Recent H5N1 infections have presented  
529 differently than seasonally influenza,<sup>13,53</sup> and shedding profiles of H5N1 may differ from  
530 those of other influenza types. We also noted that our estimate that  $10^3$  to  $10^4$  infected  
531 humans would be required to result in the minimum H5 concentration observed is 3-4  
532 orders of magnitude larger than the number of infected individuals that were empirically  
533 observed to produce a similar concentration of total IAV in Ann Arbor, Michigan and at  
534 Stanford University, as determined through case reporting and in depth outbreak  
535 investigation.<sup>2</sup> Future work is needed to better quantify human shedding of influenza in  
536 wastewater-relevant excretions.

537

538 Research is also needed into the possibility of human dietary shedding of H5 following  
539 consumption of H5N1-containing dairy products. Other single-stranded RNA viruses,  
540 such as PMMoV, brown rugose tomato virus, and porcine circoviruses, have been

541 detected in human stool following consumption of foods containing these viruses.<sup>54–57</sup> If  
542 H5 IAV present in milk or other dairy products is able to be shed in human stool,  
543 uninfected humans who consume dairy products could contribute to H5 wastewater  
544 detections.

545  
546 **Limitations.** We note that a major limitation of the study is the uncertainty in the data  
547 underlying many parameters, especially because the model was found to be sensitive to  
548 several of these related to shedding. These shedding parameters are particularly  
549 influential in the model, and in many cases are poorly understood. Concerns about this  
550 limitation are exacerbated by the observation that modeled estimates for human  
551 infections are substantially higher than would be expected based on observations from  
552 previous influenza A outbreaks of other subtypes. Despite these limitations, we feel that  
553 the model provides a helpful framework for discussing the order of magnitude estimated  
554 contributions from different sources to wastewater. More data on shedding in animals  
555 and humans will continue to improve estimates in the future.

556  
557 Another limitation of this study is that inputs from humans, poultry, wild birds, and milk  
558 were estimated separately. Multiple sources could contribute to H5 RNA wastewater  
559 detections, yet there is no information available to constrain the fraction of input that  
560 may come from each source, and thus each source was modeled separately. If multiple  
561 sources contribute H5 to the wastewater system, the number of required infected  
562 individuals or liters of milk could be lower than the lower bounds estimated by our  
563 models. Our H5 assay will detect all IAV in the H5 subtype, and this could include  
564 strains other than the currently circulating H5N1 (e.g., H5N8); however, no other H5  
565 strains are currently expected to be circulating in wastewater-relevant species. It should  
566 also be noted that the IAV genome, particularly the HA gene, has a high rate of  
567 mutation. Although the H1, H3, and H5 assays used herein are highly sensitive and  
568 specific for the dominate IAV H1, H3, and H5 subtypes circulating at the time of the  
569 study, they may not be highly sensitive and specific in different time periods during  
570 which different clades of each subtype are in circulation. For example, we have  
571 confirmed that the H1 assay is no longer sensitive for the H1N1 clade circulating in the  
572 2024-2025 flu season.

573  
574 The model developed could be applied to other sites with H5 detections in wastewater  
575 to help constrain potential sources, and we developed a Shiny app tool to allow the  
576 model to be easily deployed at other sites. For other sites using the model, however, the  
577 feasibility and appropriateness of each pathway included in the model would need to be  
578 determined based on the specifics of the wastewater system.

579

580 In this study, we show that H5 was detected in an urban California watershed months  
581 before H5N1 cases in California dairy cattle were reported. Given a lack of dairy  
582 industry in the watershed or surrounding area, the source of H5 RNA in the wastewater  
583 system was unclear. Here, we employ modeling to estimate the theoretical H5  
584 contributions from infected humans, poultry, and wildfowl, and from H5-contaminated  
585 milk. We demonstrate that humans and waterfowl are unlikely to be major contributors  
586 of H5 to the system, while poultry and milk are both feasible sources in this system.

587

### 588 **Acknowledgements**

589 We thank the Southeast San Francisco POTW staff for providing us with samples and  
590 the flow and total suspended solids data. We gratefully acknowledge all data  
591 contributors, i.e., the authors and their originating laboratories responsible for obtaining  
592 the specimens and their submitting laboratories for generating the genetic sequence  
593 and metadata and sharing via the GISAID Initiative, on which this research is based.  
594 This work was supported by a gift from the Sergey Brin Family Foundation to ABB. The  
595 graphical abstract and Figure 1 were created using [Biorender.com](#).

596

597

598

599 **References**

- 600 1. Tokars, J. I., Olsen, S. J. & Reed, C. Seasonal Incidence of Symptomatic Influenza in the  
601 United States. *Clin. Infect. Dis.* **66**, 1511–1518 (2018).
- 602 2. Wolfe, M. K. *et al.* Wastewater-Based Detection of Two Influenza Outbreaks. *Environ. Sci.*  
603 *Technol. Lett.* **9**, 687–692 (2022).
- 604 3. Toribio-Avedillo, D. *et al.* Monitoring influenza and respiratory syncytial virus in wastewater.  
605 Beyond COVID-19. *Sci. Total Environ.* **892**, 164495 (2023).
- 606 4. Lehto, K.-M. *et al.* Wastewater-based surveillance is an efficient monitoring tool for tracking  
607 influenza A in the community. *Water Res.* **257**, 121650 (2024).
- 608 5. Maida, C. M. *et al.* Detection of influenza virus in urban wastewater during the season  
609 2022/2023 in Sicily, Italy. *Front. Public Health* **12**, (2024).
- 610 6. Nypaver, C., Dehlinger, C. & Carter, C. Influenza and Influenza Vaccine: A Review. *J.*  
611 *Midwifery Womens Health* **66**, 45–53 (2021).
- 612 7. CDC. Avian Influenza Type A Viruses. *Avian Influenza (Bird Flu)* [https://www.cdc.gov/bird-](https://www.cdc.gov/bird-flu/about/index.html)  
613 [flu/about/index.html](https://www.cdc.gov/bird-flu/about/index.html) (2024).
- 614 8. Confirmations of Highly Pathogenic Avian Influenza in Commercial and Backyard Flocks |  
615 Animal and Plant Health Inspection Service. [https://www.aphis.usda.gov/livestock-poultry-](https://www.aphis.usda.gov/livestock-poultry-disease/avian/avian-influenza/hpai-detections/commercial-backyard-flocks)  
616 [disease/avian/avian-influenza/hpai-detections/commercial-backyard-flocks](https://www.aphis.usda.gov/livestock-poultry-disease/avian/avian-influenza/hpai-detections/commercial-backyard-flocks).
- 617 9. Lai, S. *et al.* Global epidemiology of avian influenza A H5N1 virus infection in humans,  
618 1997–2015: a systematic review of individual case data. *Lancet Infect. Dis.* **16**, e108–e118  
619 (2016).
- 620 10. Monto, A. S. & Fukuda, K. Lessons From Influenza Pandemics of the Last 100 Years. *Clin.*  
621 *Infect. Dis.* **70**, 951–957 (2020).
- 622 11. Peiris, J. S. M., de Jong, M. D. & Guan, Y. Avian Influenza Virus (H5N1): a Threat to Human  
623 Health. *Clin. Microbiol. Rev.* **20**, 243–267 (2007).
- 624 12. CDC. H5 Bird Flu: Current Situation. *Avian Influenza (Bird Flu)* <https://www.cdc.gov/bird->

- 625 flu/situation-summary/index.html (2024).
- 626 13. Garg, S. Outbreak of Highly Pathogenic Avian Influenza A(H5N1) Viruses in U.S. Dairy  
627 Cattle and Detection of Two Human Cases — United States, 2024. *MMWR Morb. Mortal.*  
628 *Wkly. Rep.* **73**, (2024).
- 629 14. CDC Newsroom. CDC [https://www.cdc.gov/media/releases/2024/p-0703-4th-human-case-](https://www.cdc.gov/media/releases/2024/p-0703-4th-human-case-h5.html)  
630 [h5.html](https://www.cdc.gov/media/releases/2024/p-0703-4th-human-case-h5.html) (2016).
- 631 15. CDC Newsroom. CDC <https://www.cdc.gov/media/releases/2024/p-0715-confirm-h5.html>  
632 (2016).
- 633 16. Wolfe, M. K. *et al.* Detection of Hemagglutinin H5 Influenza A Virus Sequence in Municipal  
634 Wastewater Solids at Wastewater Treatment Plants with Increases in Influenza A in Spring,  
635 2024. *Environ. Sci. Technol. Lett.* **11**, 526–532 (2024).
- 636 17. Tarbuck, N. *et al.* Detection of A(H5N1) influenza virus nucleic acid in retail pasteurized  
637 milk. Preprint at <https://doi.org/10.21203/rs.3.rs-4572362/v1> (2024).
- 638 18. Spackman, E. *et al.* Characterization of highly pathogenic avian influenza virus in retail dairy  
639 products in the US. *J. Virol.* **98**, e00881-24 (2024).
- 640 19. Thoma, G. *et al.* Greenhouse gas emissions from milk production and consumption in the  
641 United States: A cradle-to-grave life cycle assessment circa 2008. *Int. Dairy J.* **31**, S3–S14  
642 (2013).
- 643 20. Byker, C. J., Farris, A. R., Marcenelle, M., Davis, G. C. & Serrano, E. L. Food Waste in a  
644 School Nutrition Program After Implementation of New Lunch Program Guidelines. *J. Nutr.*  
645 *Educ. Behav.* **46**, 406–411 (2014).
- 646 21. Shanks, C. B., Bark, K., Stenberg, M., Gamble, J. & Parks, C. Milk Consumption and Waste  
647 Across 5 Montana High School Lunch Programs. *J. Sch. Health* **90**, 718–723 (2020).
- 648 22. Dolinski, A. C., Jankowski, M. D., Fair, J. M. & Owen, J. C. The association between  
649 SAα2,3Gal occurrence frequency and avian influenza viral load in mallards (*Anas*  
650 *platyrhynchos*) and blue-winged teals (*Spatula discors*). *BMC Vet. Res.* **16**, 430 (2020).

- 651 23. Germeraad, E. A. *et al.* Virus Shedding of Avian Influenza in Poultry: A Systematic Review  
652 and Meta-Analysis. *Viruses* **11**, 812 (2019).
- 653 24. Boehm, A. B. *et al.* Human viral nucleic acids concentrations in wastewater solids from  
654 Central and Coastal California USA. *Sci. Data* **10**, 396 (2023).
- 655 25. Topol, A. *High Throughput RNA Extraction and PCR Inhibitor Removal of Settled Solids for*  
656 *Wastewater Surveillance of SARS-CoV-2 RNA V2*. [https://www.protocols.click/view/high-](https://www.protocols.click/view/high-throughput-rna-extraction-and-pcr-inhibitor-r-b2mkqc4w)  
657 [throughput-rna-extraction-and-pcr-inhibitor-r-b2mkqc4w](https://www.protocols.click/view/high-throughput-rna-extraction-and-pcr-inhibitor-r-b2mkqc4w) (2021)  
658 doi:10.17504/protocols.io.b2mkqc4w.
- 659 26. Boehm, A. B. *et al.* Human pathogen nucleic acids in wastewater solids from 191  
660 wastewater treatment plants in the United States. *Sci. Data* **11**, 1141 (2024).
- 661 27. Roldan-Hernandez, L., Oost, C. V. & B. Boehm, A. Solid–liquid partitioning of dengue, West  
662 Nile, Zika, hepatitis A, influenza A, and SARS-CoV-2 viruses in wastewater from across the  
663 USA. *Environ. Sci. Water Res. Technol.* (2024) doi:10.1039/D4EW00225C.
- 664 28. Lowry, S. A., Wolfe, M. K. & Boehm, A. B. Respiratory virus concentrations in human  
665 excretions that contribute to wastewater: a systematic review and meta-analysis. *J. Water*  
666 *Health* **21**, 831–848 (2023).
- 667 29. Crank, K., Chen, W., Bivins, A., Lowry, S. & Bibby, K. Contribution of SARS-CoV-2 RNA  
668 shedding routes to RNA loads in wastewater. *Sci. Total Environ.* **806**, 150376 (2022).
- 669 30. Dovas, C. I. *et al.* Detection and Quantification of Infectious Avian Influenza A (H5N1) Virus  
670 in Environmental Water by Using Real-Time Reverse Transcription-PCR. *Appl. Environ.*  
671 *Microbiol.* **76**, 2165–2174 (2010).
- 672 31. Humphreys, J. M. *et al.* Waterfowl occurrence and residence time as indicators of H5 and  
673 H7 avian influenza in North American Poultry. *Sci. Rep.* **10**, 2592 (2020).
- 674 32. Arena, C. *et al.* Simultaneous investigation of influenza and enteric viruses in the stools of  
675 adult patients consulting in general practice for acute diarrhea. *Viol. J.* **9**, 116 (2012).
- 676 33. Hirose, R. *et al.* Long-term detection of seasonal influenza RNA in faeces and intestine.



- 677 *Clin. Microbiol. Infect.* **22**, 813.e1-813.e7 (2016).
- 678 34. Chan, M. C. W., Lee, N., Chan, P. K. S., Leung, T. F. & Sung, J. J. Y. Fecal detection of  
679 influenza A virus in patients with concurrent respiratory and gastrointestinal symptoms. *J.*  
680 *Clin. Virol.* **45**, 208–211 (2009).
- 681 35. Chan, M. C. W. *et al.* Seasonal Influenza A Virus in Feces of Hospitalized Adults. *Emerg.*  
682 *Infect. Dis.* **17**, 2038–2042 (2011).
- 683 36. Tańczuk, M., Junga, R., Kolasa-Wiecek, A. & Niemiec, P. Assessment of the Energy  
684 Potential of Chicken Manure in Poland. *Energies* **12**, 1244 (2019).
- 685 37. Owen, R. B., Jr. The Bioenergetics of Captive Blue-Winged Teal under Controlled and  
686 Outdoor Conditions. *The Condor* **72**, 153–163 (1970).
- 687 38. Julian, T. R., Canales, R. A., Leckie, J. O. & Boehm, A. B. A model of exposure to rotavirus  
688 from nondietary ingestion iterated by simulated intermittent contacts. *Risk Anal. Off. Publ.*  
689 *Soc. Risk Anal.* **29**, 617–632 (2009).
- 690 39. Xue, J. *et al.* A Probabilistic Arsenic Exposure Assessment for Children Who Contact  
691 Chromated Copper Arsenate (CCA)-Treated Playsets and Decks, Part 2: Sensitivity and  
692 Uncertainty Analyses. *Risk Anal.* **26**, 533–541 (2006).
- 693 40. Borchardt, M. A. *et al.* The Environmental Microbiology Minimum Information (EMMI)  
694 Guidelines: qPCR and dPCR Quality and Reporting for Environmental Microbiology.  
695 *Environ. Sci. Technol.* **55**, 10210–10223 (2021).
- 696 41. McClary-Gutierrez, J. S. *et al.* Standardizing data reporting in the research community to  
697 enhance the utility of open data for SARS-CoV-2 wastewater surveillance. *Environ. Sci.*  
698 *Water Res. Technol.* **7**, 1545–1551 (2021).
- 699 42. Health, D. of P. California Department of Public Health.  
700 <https://www.cdph.ca.gov/Programs/CID/DCDC>.
- 701 43. Stewart, H., Kuchler, F. & Hahn, W. Is competition among soft drinks, juices, and other  
702 major beverage categories responsible for reducing Americans' milk consumption?

- 703 *Agribusiness* **37**, 731–748 (2021).
- 704 44. HPAI Confirmed Cases in Livestock | Animal and Plant Health Inspection Service.  
705 [https://www.aphis.usda.gov/livestock-poultry-disease/avian/avian-influenza/hpai-](https://www.aphis.usda.gov/livestock-poultry-disease/avian/avian-influenza/hpai-detections/hpai-confirmed-cases-livestock)  
706 [detections/hpai-confirmed-cases-livestock](https://www.aphis.usda.gov/livestock-poultry-disease/avian/avian-influenza/hpai-detections/wild-birds).
- 707 45. HPAI Detections in Wild Birds. [https://www.aphis.usda.gov/livestock-poultry-](https://www.aphis.usda.gov/livestock-poultry-disease/avian/avian-influenza/hpai-detections/wild-birds)  
708 [disease/avian/avian-influenza/hpai-detections/wild-birds](https://www.aphis.usda.gov/livestock-poultry-disease/avian/avian-influenza/hpai-detections/wild-birds).
- 709 46. Bordes, L. *et al.* Experimental infection of chickens, Pekin ducks, Eurasian wigeons and  
710 Barnacle geese with two recent highly pathogenic avian influenza H5N1 clade 2.3.4.4b  
711 viruses. *Emerg. Microbes Infect.* **13**, 2399970 (2024).
- 712 47. Hobbelen, P. H. F. *et al.* Estimating the introduction time of highly pathogenic avian  
713 influenza into poultry flocks. *Sci. Rep.* **10**, 12388 (2020).
- 714 48. Cui, P. *et al.* Does pasteurization inactivate bird flu virus in milk? *Emerg. Microbes Infect.*  
715 **13**, 2364732 (2024).
- 716 49. Schafers, J. *et al.* Pasteurisation temperatures effectively inactivate influenza A viruses in  
717 milk. 2024.05.30.24308212 Preprint at <https://doi.org/10.1101/2024.05.30.24308212> (2024).
- 718 50. Nooruzzaman, M. *et al.* Thermal inactivation spectrum of influenza A H5N1 virus in raw milk.  
719 2024.09.21.614205 Preprint at <https://doi.org/10.1101/2024.09.21.614205> (2024).
- 720 51. Suarez, D. L. *et al.* Testing of retail cheese, butter, ice cream and other dairy products for  
721 highly pathogenic avian influenza in the US. 2024.08.11.24311811 Preprint at  
722 <https://doi.org/10.1101/2024.08.11.24311811> (2024).
- 723 52. Mellis, A. M. Serologic Evidence of Recent Infection with Highly Pathogenic Avian Influenza  
724 A(H5) Virus Among Dairy Workers — Michigan and Colorado, June–August 2024. *MMWR*  
725 *Morb. Mortal. Wkly. Rep.* **73**, (2024).
- 726 53. Uyeki, T. M. *et al.* Highly Pathogenic Avian Influenza A(H5N1) Virus Infection in a Dairy  
727 Farm Worker. *N. Engl. J. Med.* **390**, 2028–2029 (2024).
- 728 54. Zhang, T. *et al.* RNA Viral Community in Human Feces: Prevalence of Plant Pathogenic

- 729 Viruses. *PLOS Biol.* **4**, e3 (2005).
- 730 55. Colson, P. *et al.* Pepper Mild Mottle Virus, a Plant Virus Associated with Specific Immune  
731 Responses, Fever, Abdominal Pains, and Pruritus in Humans. *PLOS ONE* **5**, e10041  
732 (2010).
- 733 56. Li, L. *et al.* Multiple Diverse Circoviruses Infect Farm Animals and Are Commonly Found in  
734 Human and Chimpanzee Feces. *J. Virol.* **84**, 1674–1682 (2010).
- 735 57. Natarajan, A. *et al.* The Tomato Brown Rugose Fruit Virus Movement Protein Gene Is a  
736 Novel Microbial Source Tracking Marker. *Appl. Environ. Microbiol.* **89**, e00583-23 (2023).
